# Supplementary material for: Assessing the Conversion of Various Nylon Polymers in the Hydrothermal Liquefaction of Macroalgae
Source: MDPI journal article supplement (doi:10.3390/environments8040034), 2021-04-15
Supplement: s1 [file s1]

*Supplementary Material*

# Assessing the conversion of various nylon polymers in the hydrothermal liquefaction of macroalgae

Sukanya Hongthong,<sup>1,2\*</sup> Hannah S. Leese,<sup>2</sup> Michael J. Allen,<sup>3,4</sup> Christopher J. Chuck<sup>2</sup>

<sup>1</sup> Department of Production Engineering, Chaiyaphum Rajabhat University, 36000, Thailand

<sup>2</sup> Department of Chemical Engineering, University of Bath, Claverton Down, Bath BA2 7AY, United Kingdom

<sup>3</sup> Plymouth Marine Laboratory, Prospect Place, The Hoe, Plymouth -89PL1 3DH, United Kingdom

<sup>4</sup> College of Life and Environmental Sciences, University of Exeter, Exeter, EX4 4QD, UK

\* Correspondence: sukanya.ho@cpru.ac.th; +66840029670

## 1. Feedstock elemental compositions

**Table S1.** Feedstock elemental compositions

| Analysis                  | Seaweed | Nylon6 | Nylon6/6 | Nylon6/12 | Nylon12 |
|---------------------------|---------|--------|----------|-----------|---------|
| Moisture                  | 4.9     | -      | -        | -         | -       |
| Ash                       | 25%     | -      | -        | -         | -       |
| Element Analysis (%)      |         |        |          |           |         |
| C                         | 35.3    | 63.3   | 62.7     | 68.9      | 72.6    |
| H                         | 5.1     | 10.1   | 10.2     | 11.6      | 12.0    |
| N                         | 7.1     | 12.3   | 12.4     | 9.0       | 7.0     |
| other                     | 57.5    | 14.25  | 14.6     | 10.4      | 8.3     |
| HHV                       | 8.9     | 33.2   | 33.2     | 38.0      | 40.2    |
| Component analysis (wt.%) |         |        |          |           |         |
| Carbohydrate              | 53.6    |        |          |           |         |
| Protein                   | 13.8    |        |          |           |         |
| Lipid                     | 7.5     |        |          |           |         |

## 2. Calibration curves for quantification of unreacted plastics in bio-char using FTIR

The conversion of nylons6 was estimated by plotting calibration curves of known amounts of the nylons with solid residue generated from the HTL reaction which contained only macroalgae biomass. Calibration curves were created for each nylon/biomass combination (nylon6/macroalgae, nylon66/macroalgae, nylon6,12/macroalgae, nylon 12/macroalgae) by mixing bio-char from HTL of pure marine macroalgae with nylons at a range of known concentrations.

### 2.1 Nylon 6 in solid bio-char

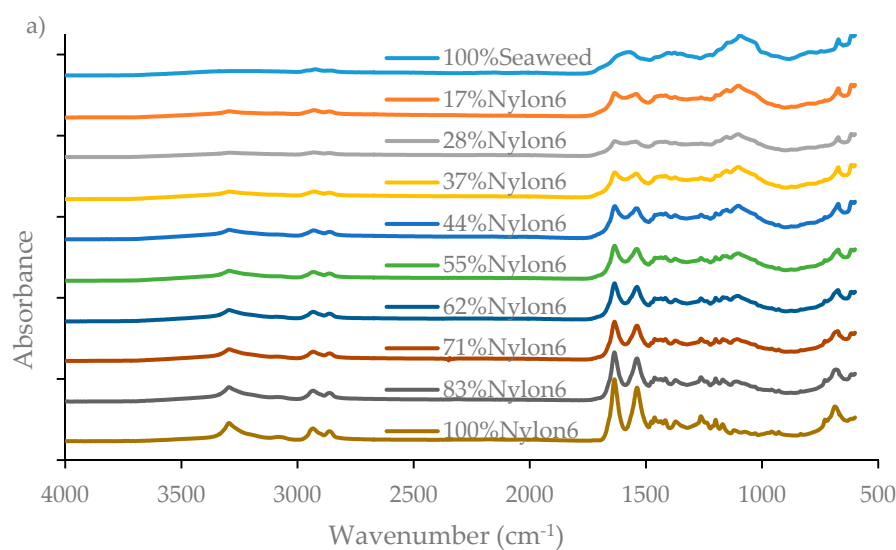

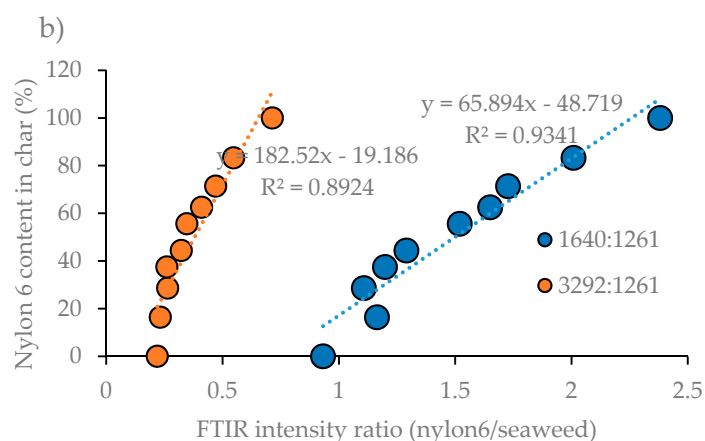

**Figure S1.** (a) FTIR spectra of macroalgae bio-char with different nylon6 contents, and (b) peak intensity ratio calibration curve for nylon6/6 content in macroalgae bio-char.

**Table S2.** Calculated percentage concentrations of unreacted nylon6 in bio-char from co-liquefaction of macroalgae with nylon6.

|              | Nylon 6               | Macroalgae<br>solid residue | PIR       | Predictive<br>equation | R2   | Estimated Nylon 6<br>content of char (%) |
|--------------|-----------------------|-----------------------------|-----------|------------------------|------|------------------------------------------|
|              | 1640 cm <sup>-1</sup> | 1261 cm <sup>-1</sup>       | 1640:1261 | Y = 65.859x - 48.934   | 0.94 |                                          |
| 5% Nylon 6   | 0.01962               | 0.02332                     | 0.84126   |                        |      | 6.5 %                                    |
| 20% Nylon 6  | 0.03596               | 0.04031                     | 0.8921    |                        |      | 9.8%                                     |
| 50% Nylon 6  | 0.02047               | 0.01571                     | 1.3031    |                        |      | 36.8%                                    |
|              | 3292 cm <sup>-1</sup> | 1261 cm <sup>-1</sup>       | 3292:1261 | Y = 199.82x - 17.088   |      |                                          |
| 5 % Nylon 6  | 0.00114               | 0.02332                     | 0.04895   |                        |      | 0.0%                                     |
| 20 % Nylon 6 | 0.00561               | 0.04031                     | 0.13906   |                        |      | 6.0%                                     |
| 50 % Nylon 6 | 0.00894               | 0.01571                     | 0.56932   |                        |      | 84.4%                                    |

## 2.2 Nylon 6/6 in solid char

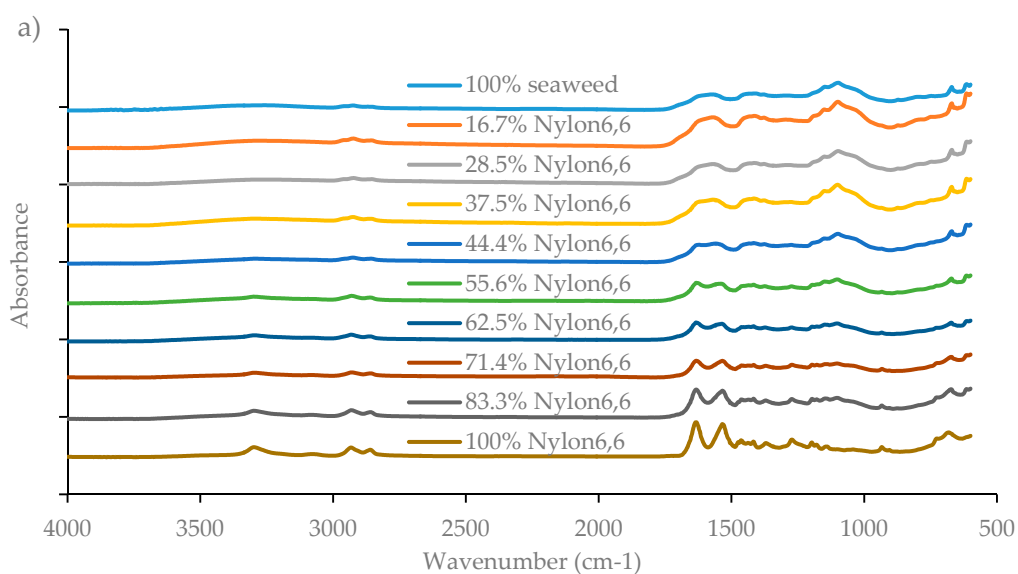

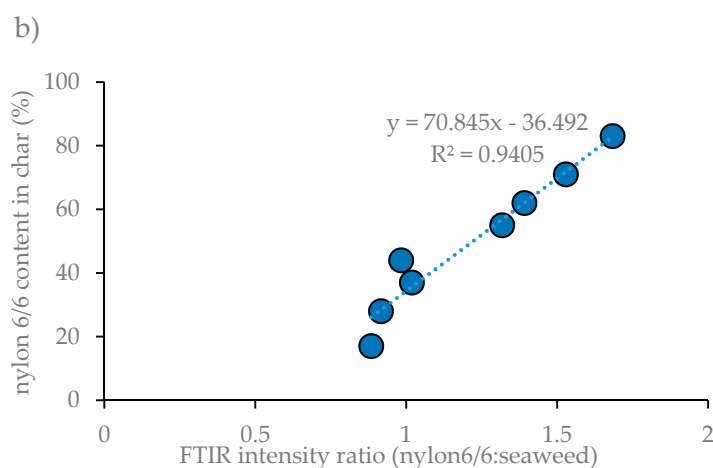

**Figure S2.** (a) FTIR spectra of macroalgae bio-char with different nylon6/6 contents, and (b) peak intensity ratio calibration curve for nylon6/6 content in macroalgae bio-char.

**Table S3.** Calculated percentage concentrations of unreacted nylon6/6 in bio-char from co-liquefaction of macroalgae with nylon6/6.

|               | Nylon 6/6             | seaweed solid residue | PIR       | Predictive equation | R2   | Estimated Nylon 6/6 content of char (%) |
|---------------|-----------------------|-----------------------|-----------|---------------------|------|-----------------------------------------|
|               | 1640 cm <sup>-1</sup> | 1261 cm <sup>-1</sup> | 1640:1261 | Y = 70.845x-36.492  | 0.94 |                                         |
| 5% Nylon 6/6  | 0.02251               | 0.037211              | 0.604955  |                     |      | 6.4 %                                   |
| 20% Nylon 6/6 | 0.03188               | 0.027787              | 1.147120  |                     |      | 44.8%                                   |
| 50% Nylon 6/6 | 0.04821               | 0.03052               | 1.588451  |                     |      | 76.0%                                   |

### 2.3 Nylon 6/12 in solid bio-char

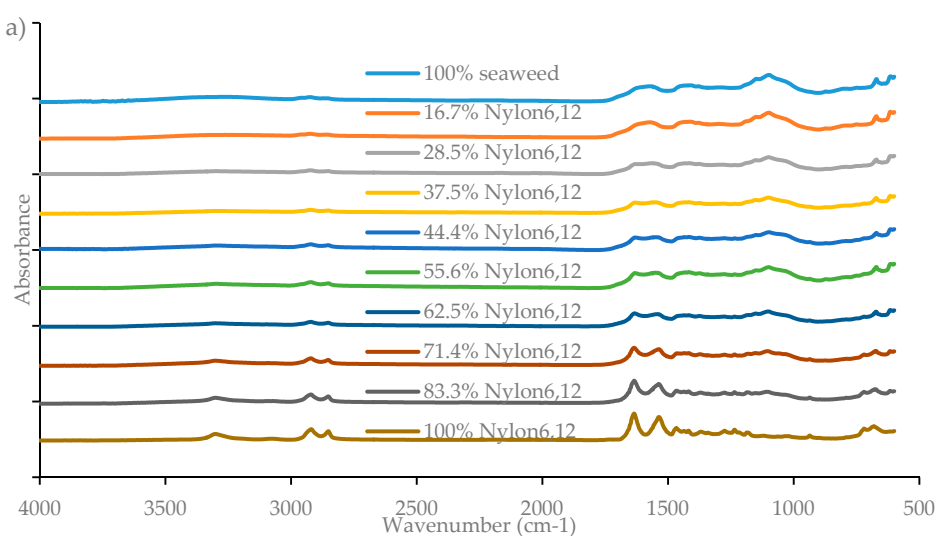

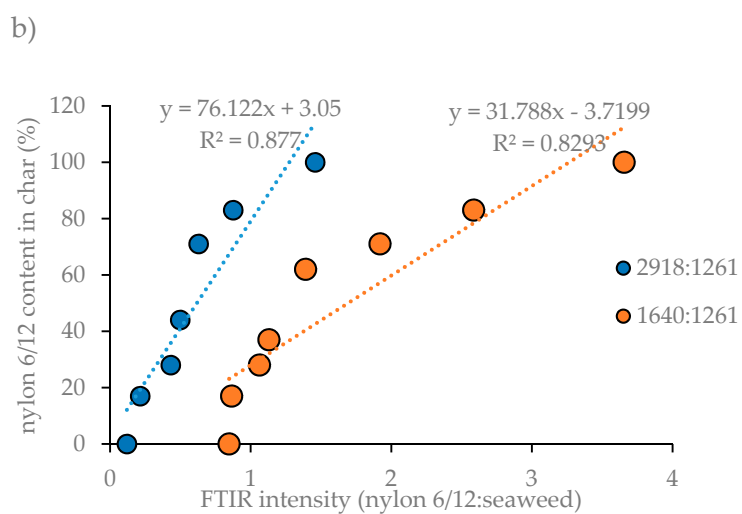

**Figure S3.** (a) FTIR spectra of macroalga io-char with different nylon6/12 contents, and (b) peak intensity ratio calibration curve for nylon6/12 content in macroalgae bio-char.

**Table S4.** Calculated percentage concentrations of unreacted nylon6/12 in bio-char from co-liquefaction of macroalgae with nylon6/12.

|                | Nylon 6/12            | seaweed solid                    | PIR       | Predictive                    | R2   | Estimated Nylon 6/12 |
|----------------|-----------------------|----------------------------------|-----------|-------------------------------|------|----------------------|
|                | 1640 cm <sup>-1</sup> | residue<br>1261 cm <sup>-1</sup> | 1640:1261 | equation<br>Y = 31.788-3.7199 | 0.83 | content of char (%)  |
| 5% Nylon6/12   | 0.033626              | 0.036728                         | 0.9155473 |                               |      | 25.4 %               |
| 20% Nylon6/12  | 0.03394               | 0.022046                         | 1.5396717 |                               |      | 45.2%                |
| 50% Nylon6/12  | 0.05401               | 0.021718                         | 2.4885014 |                               |      | 75.4%                |
|                | 2981 cm <sup>-1</sup> | 1261 cm <sup>-1</sup>            | 2981:1261 | Y= 76.122x + 3.05             | 0.88 |                      |
| 5 % Nylon 6/12 | 0.01232               | 0.036728                         | 0.33532   |                               |      | 28.6%                |
| 20 %           | 0.01865               | 0.022046                         | 0.84611   |                               |      | 67.5%                |
| Nylon 6/12     |                       |                                  |           |                               |      |                      |
| 50 %Nylon 6/12 | 0.03917               | 0.02171                          | 1.80478   |                               |      | 140.4%               |

## 2.4 Nylon 12 in solid bio-char

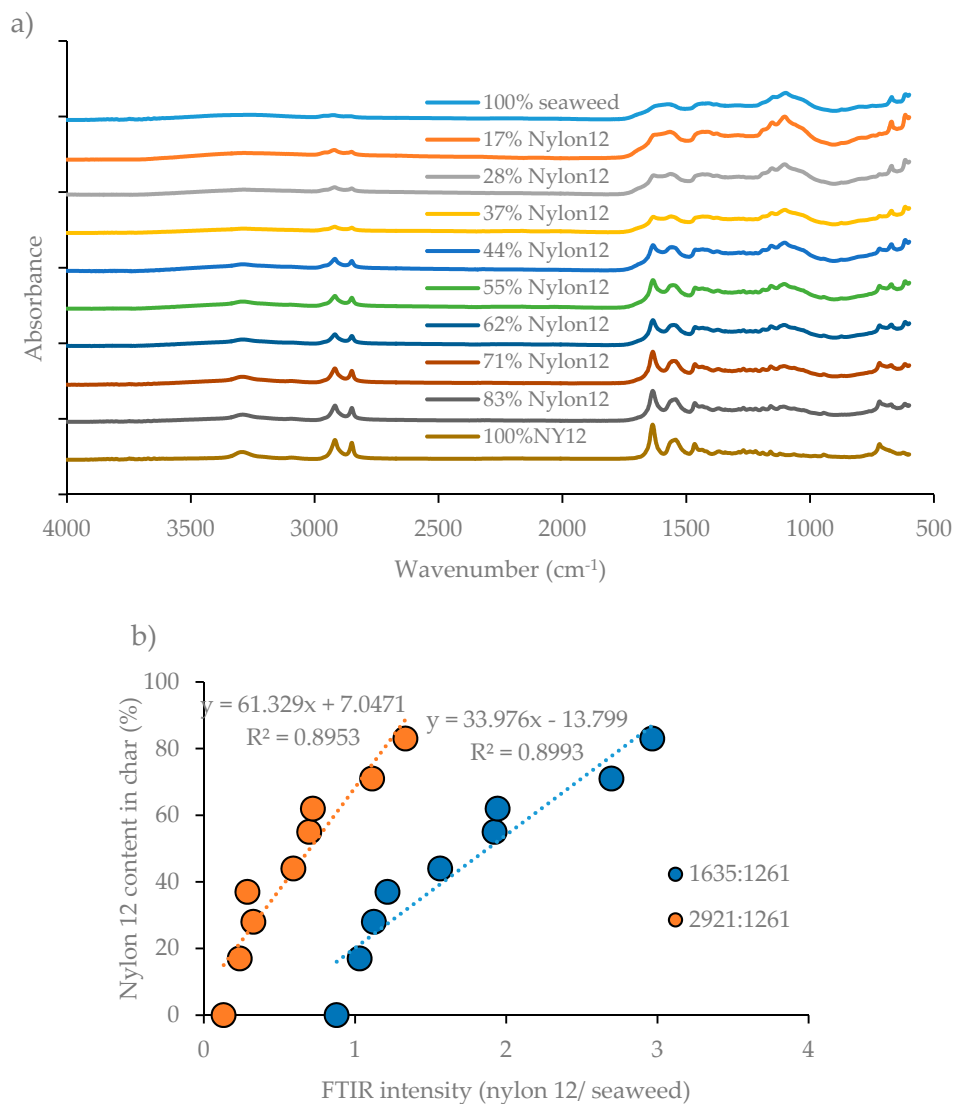

**Figure S4.** (a) FTIR spectra of macroalgae bio-char with different nylon12 contents, and (b) peak intensity ratio calibration curve for nylon12 content in macroalgae bio-char.

**Table S5.** Calculated percentage concentrations of unreacted nylon12 in bio-char from co-liquefaction of macroalgae with nylon12.

|              | Nylon 12<br>1635 cm <sup>-1</sup> | Macroalgae<br>solid residue<br>1261 cm <sup>-1</sup> | PIR<br>1635:1261 | Predictive equation<br>Y = 33.976x-13.799 | R2<br>0.8993 | Estimated Nylon 6<br>content of char (%) |
|--------------|-----------------------------------|------------------------------------------------------|------------------|-------------------------------------------|--------------|------------------------------------------|
| 5% Nylon 12  | 0.04848                           | 0.04414                                              | 1.09848          |                                           |              | 23.0 %                                   |
| 20% Nylon 12 | 0.03356                           | 0.01629                                              | 2.06066          |                                           |              | 56.2 %                                   |
| 50% Nylon 12 | 0.07234                           | 0.02729                                              | 2.65072          |                                           |              | 76.3 %                                   |
|              | 2912 cm <sup>-1</sup>             | 1261 cm <sup>-1</sup>                                | 2912:1261        | Y= 61.329x + 7.0471                       | 0.8953       |                                          |
| 5% Nylon 12  | 0.00617                           | 0.04414                                              | 0.13984          |                                           |              | 32.9 %                                   |
| 20% Nylon 12 | 0.00297                           | 0.01629                                              | 0.18255          |                                           |              | 40.6 %                                   |
| 50% Nylon 12 | 0.00143                           | 0.02729                                              | 0.52393          |                                           |              | 102.6 %                                  |

### 3 Quantification of plastic conversion

$$\text{Plastic in solid residue (g)} = \frac{\text{unconverted in solid residue (\%)} \times \text{solid residue yield (g)}}{100}$$

$$\text{Plastic convert (g)} = \text{plastic in feedstock} - \text{plastic in solid residue}$$

$$\text{Conversion (\%)} = \frac{\text{plastic convert (g)} \times 100}{\text{plastic in feedstock (g)}}$$

**Table S6.** Summary of plastics conversion

| Plastic components | Initial nylon in feedstock (g) | Total solid residue from reaction (g) | Estimated nylon content of char (%) | Amount of nylon in solid residue (g) | nylon conversion (%) |
|--------------------|--------------------------------|---------------------------------------|-------------------------------------|--------------------------------------|----------------------|
| 5% Nylon 6         | 0.15 g                         | 0.98 g                                | 0%                                  | 0.15 g                               | 100%                 |
| 20% Nylon 6        | 0.6 g                          | 0.93 g                                | 7.9%                                | 0.53 g                               | 88%                  |
| 50% Nylon 6        | 1.50 g                         | 0.93 g                                | 61 %                                | 0.94 g                               | 62%                  |
| 5% Nylon 6/6       | 0.15 g                         | 1.07 g                                | 6.4 %                               | 0.08 g                               | 54%                  |
| 20% Nylon 6/6      | 0.6 g                          | 1.09 g                                | 44.8%                               | 0.11 g                               | 19%                  |
| 50% Nylon 6/6      | 1.50 g                         | 1.22 g                                | 76%                                 | 0.57 g                               | 38%                  |
| 5% Nylon 6/12      | 0.15 g                         | 1.09 g                                | 25.4%                               | 0 g                                  | 0%                   |
| 20% Nylon 6/12     | 0.6 g                          | 1.07 g                                | 56%                                 | 0 g                                  | 0%                   |
| 50% Nylon 6/12     | 1.50 g                         | 1.66 g                                | 108%                                | 0 g                                  | 0%                   |
| 5% Nylon 12        | 0.15 g                         | 1.22 g                                | 28.2 %                              | 0 g                                  | 0%                   |
| 20% Nylon 12       | 0.6 g                          | 1.12 g                                | 48.3%                               | 0.06 g                               | 9%                   |
| 50% Nylon 12       | 1.50 g                         | 1.50 g                                | 89.4%                               | 0.17 g                               | 12%                  |
| 5% Nylon line      | 0.15 g                         | 0.66                                  | 6.2                                 | 0.041                                | 73%                  |
| 20% Nylon line     | 0.6 g                          | 0.97                                  | 10.5                                | 0.10                                 | 83%                  |
| 50% Nylon line     | 1.50 g                         | 1.10                                  | 62.4                                | 0.69                                 | 54%                  |

#### 4. GC/MS analysis of bio-crudes

The identities of notable compounds in bio-crudes from co-liquefaction of macroalgal biomass with nylon blends, identified using GC/MS, are presented in Table S7 below.

**Table S7.** Identities of notable compounds in bio-crude products from co-liquefaction of macroalgal biomass with 20 wt.% nylons.

| Compound identified                  | 100% SW | 20 wt.% NY6 | 20 wt.% NY6/6 | 20 wt.% NY6/12 | 20 wt.% NY12 |
|--------------------------------------|---------|-------------|---------------|----------------|--------------|
| Ethane, 1,1-diethoxy-                | -       |             |               | -              | -            |
| Toluene                              | -       | -           |               | -              |              |
| Formic acid, TBDMS derivative        | -       | -           |               |                | -            |
| Cyclopentanone                       | -       |             |               | -              | -            |
| Butanoic acid                        |         |             |               |                |              |
| Piperidine, 1-ethyl-                 |         |             |               |                |              |
| 1-Methoxy-2-propyl acetate           | -       |             |               | -              | -            |
| 4-Piperidone                         | -       | -           |               | -              | -            |
| Hexamethylenimine                    | -       | -           |               |                | -            |
| 1-Butanamine, N-methyl-N-2-propenyl- | -       | -           | -             |                | -            |
| 2-Cyclopenten-1-one, 2-methyl-       |         |             |               |                |              |
| Acetic acid, TBDMS derivative        | -       | -           |               |                | -            |
| Butyrolactone                        | -       |             |               |                |              |
| 2-Cyclopenten-1-one, 3-methyl-       |         |             |               |                |              |
| Phenol                               |         |             |               |                |              |
| 2-Cyclopenten-1-one, 3,4-dimethyl-   |         |             |               |                |              |
| 2-Cyclopenten-1-one, 2,3-dimethyl-   |         |             |               |                |              |
| Propanoic acid, TBDMS derivative     | -       | -           |               |                |              |
| Butyric Acid, TBDMS derivative       |         |             |               |                | -            |

| Compound identified                      | 100% SW | 20 wt.% NY6 | 20 wt.% NY6/6 | 20 wt.% NY6/12 | 20 wt.% NY12 |
|------------------------------------------|---------|-------------|---------------|----------------|--------------|
| p-Cresol                                 |         |             |               |                |              |
| tert-Butyldimethylsilyl methacrylate     | -       | -           |               |                | -            |
| Furan, 2-propyl-                         | -       |             | -             |                | -            |
| 2,5-Pyrrolidinedione, 1-methyl-          |         |             |               |                |              |
| Phenol, 2-methyl-                        |         |             |               |                |              |
| Ethanone, 1-(1-cyclohexen-1-yl)-         |         |             |               |                |              |
| Ethanone, 1-(2-thienyl)-                 |         |             |               |                |              |
| Phenylethyl Alcohol                      |         |             |               |                |              |
| 3-Pyridinol                              |         |             |               |                |              |
| Caprolactam                              |         |             |               | -              | -            |
| m-Aminophenylacetylene                   | -       | -           |               |                | -            |
| Phenol, p-tert-butyl-                    |         |             | -             |                | -            |
| Indole                                   |         |             |               |                |              |
| Dodecanamide                             |         |             | -             |                | -            |
| Tetradecanoic acid                       |         |             | -             |                |              |
| n-Hexadecanoic acid                      |         |             | -             |                | -            |
| Pentanoic acid                           | -       | -           |               |                |              |
| Cyclododecanone                          | -       | -           | -             |                |              |
| Benzenesulfonamide, N-butyl-             |         |             |               |                | -            |
| 9-Octadecenamide, (Z)-                   | -       |             | -             |                | -            |
| Ethanol, 2-ethoxy-                       |         | -           |               |                | -            |
| Phthalic acid, cyclobutyl tridecyl ester | -       |             | -             | -              | -            |
| 1,8-Diazacyclotetradecane-2,7-dione      | -       | -           |               | -              | -            |
| Myristic acid, TBDMS derivative          | -       | -           | -             |                |              |

| Compound identified                     | 100% SW | 20 wt.% NY6 | 20 wt.% NY6/6 | 20 wt.% NY6/12 | 20 wt.% NY12 |
|-----------------------------------------|---------|-------------|---------------|----------------|--------------|
| Heneicosane                             | -       | -           | -             |                |              |
| Heptadecane                             | -       | -           | -             |                |              |
| Oleic Acid, (E)-, TBDMS derivative      | -       | -           | -             |                | -            |
| Phthalic acid, di(2-propylpentyl) ester | -       | -           |               |                |              |

## 5. Yield of nylon product

The yield of nylon products from the system in both observed from aqueous and biocrude product from co-liquefaction of macroalgal biomass with nylon blends were estimated using LC/MS and GC/MS.

a) LC-MS

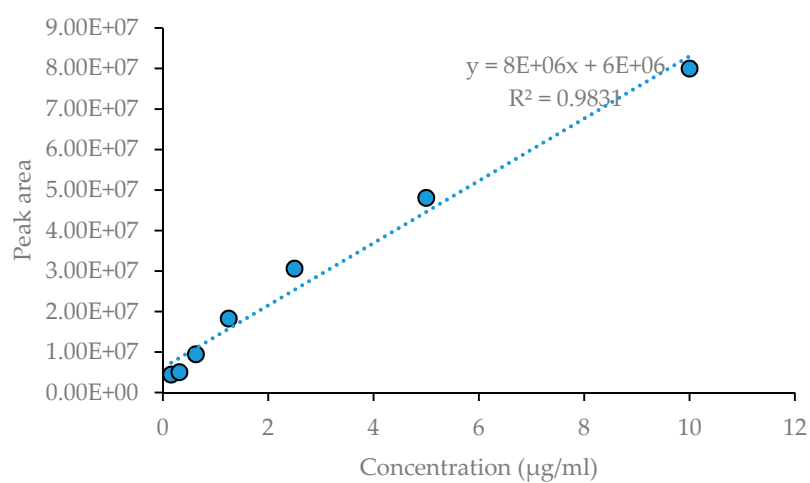

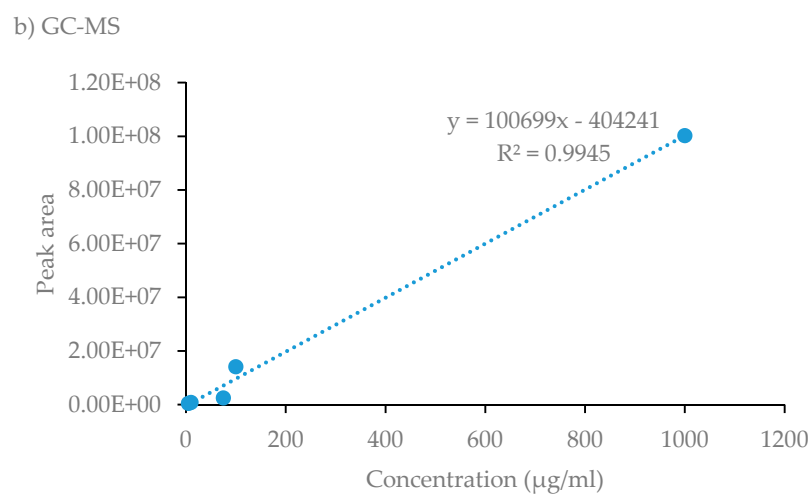

**Figure S5.** Calibration curve the peak area of  $\epsilon$ -caprolactam by a) LC-MS, and b) GC-MS using the standard additional method

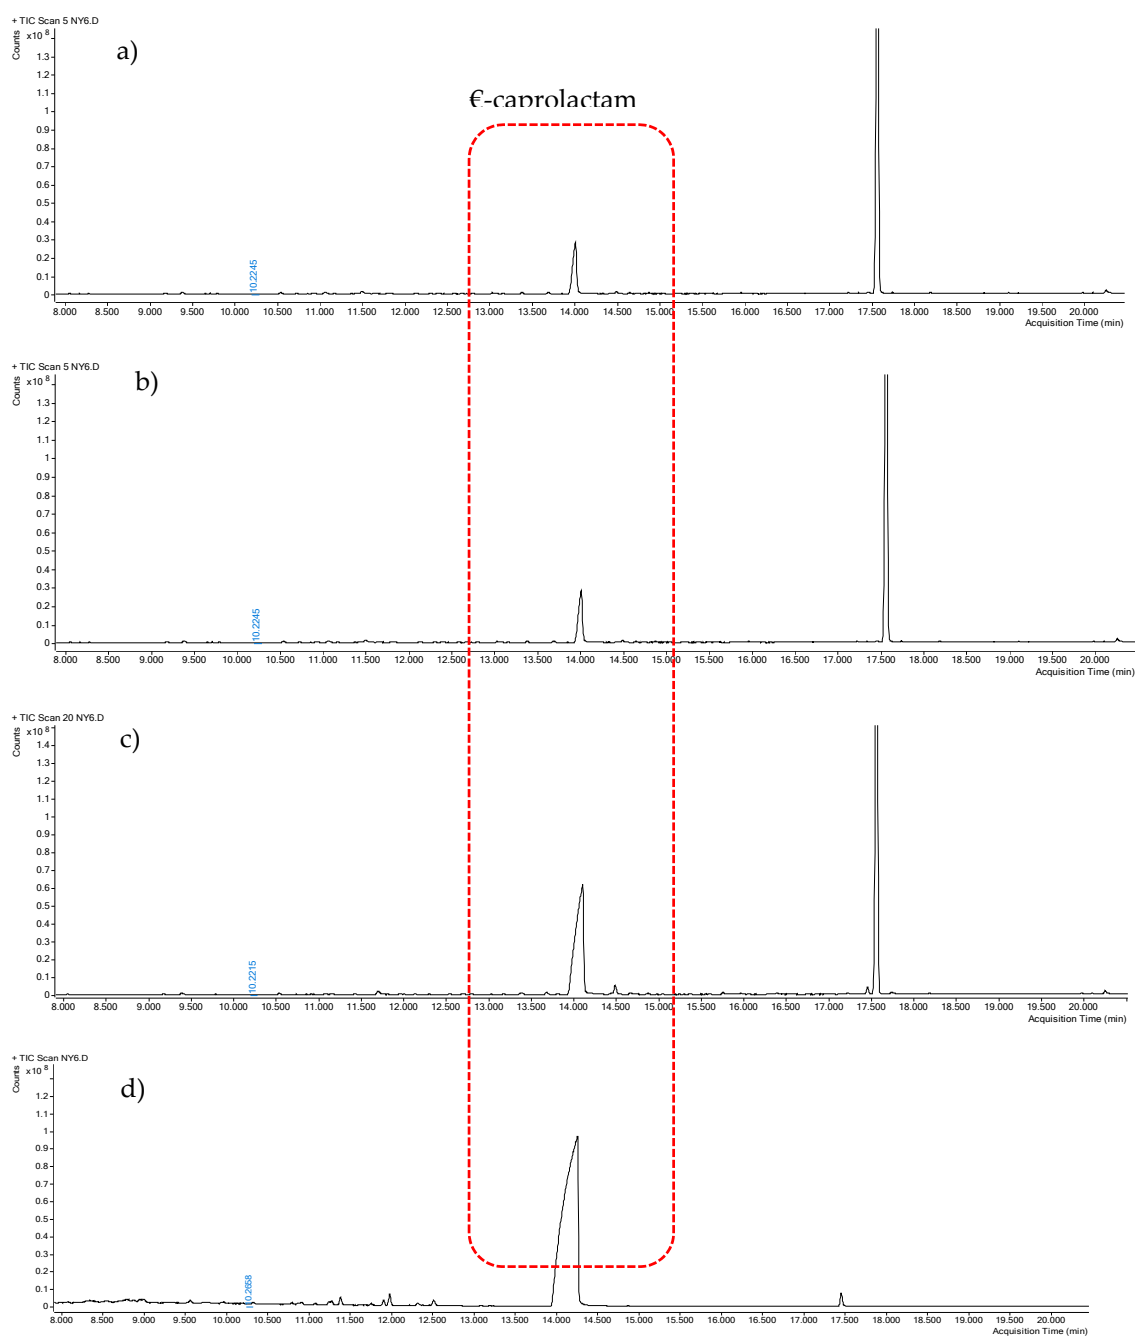

**Figure S6.** GC-MS chromatographs of bio-crude created from (a) 100% pure marine macroalgae, (b) 5 wt.% nylon 6 blend (c) 20 wt.% nylon 6 blend, and (d), 100 wt.% nylon 6
